# Supplementary material for: Humidity-Resistive Optical NO Gas Sensor Devices Based on Cobalt Tetraphenylporphyrin Dispersed in Hydrophobic Polymer Matrix
Source: MDPI journal article supplement (doi:10.3390/s20051295), 2020-02-27
Supplement: s1 [file s1]

# Supporting Information

## Humidity-Resistive Optical NO Gas Sensor Devices Based on the Cobalt Tetraphenylporphyrin Dispersed in Hydrophobic Polymer Matrix

Shunsuke Shiba, Kohei Yamada and Masanobu Matsuguchi \*

Department of Materials Science and Biotechnology, Graduate School of Science and Engineering, Ehime University,  
3-Bunkyo-cho, Matsuyama, Ehime 790-0826, Japan; shiba.shunsuke.yu@ehime-u.ac.jp

\* Correspondence: matsuguchi@ehime-u.ac.jp; Tel.: +81-89-927-9933

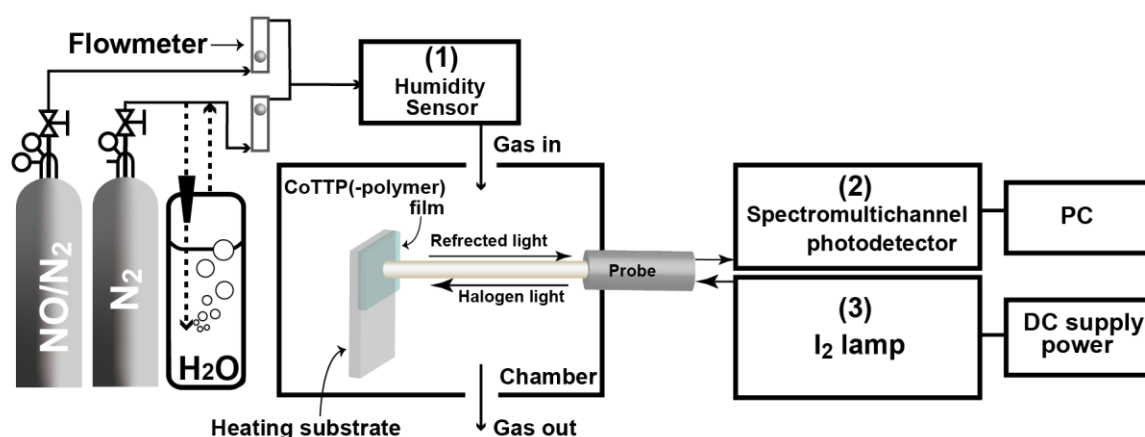

**Figure S1.** Block diagram of the optical system equipped with (1) separate type humidity sensor (HTY7843, Yamatake), (2) Spectromultichannel photodetector MSPD-7000; Otsuka Electronics), (3) I<sub>2</sub> lamp (MC-2563; Otsuka Electronics), and so on. Dotted arrows indicate the gas flow root in case of requiring high humidity.

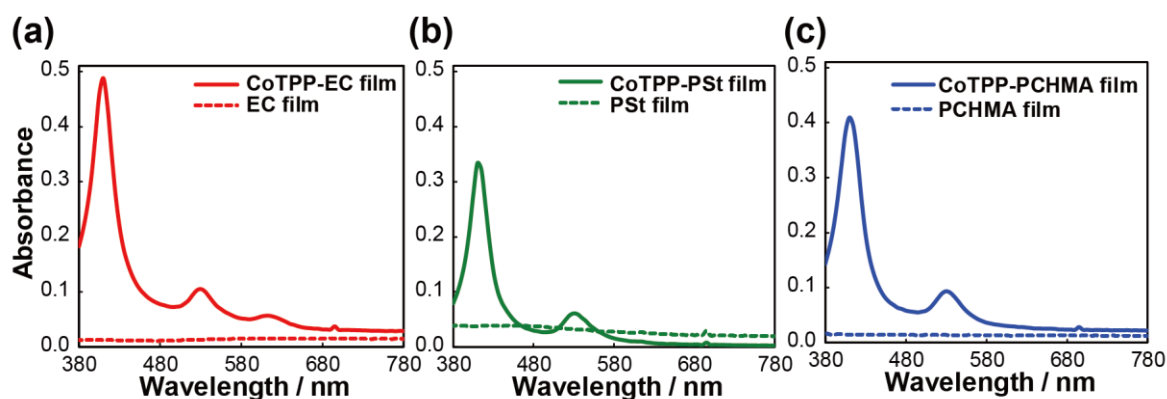

**Figure S2.** UV-vis absorbance spectra of (a) EC film (red), (b) PSt film (green), and (c) PCHMA film (blue) with (solid line) or without (dotted line) CoTTP.

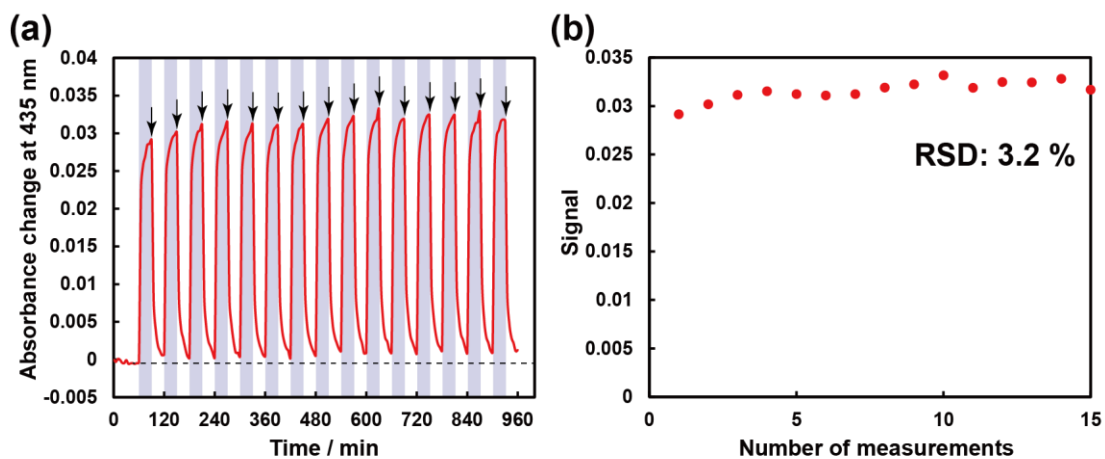

**Figure S3.** Stability test of CoTPP-EC film. **(a)** Repeated measurements of 1 ppm NO/N<sub>2</sub>. The blue zone indicates the periods of NO gas introduction. Dotted line and arrows indicate the baseline and the point 30 min after introducing NO gas. **(b)** Data plots of the signals calculated from (a) on the number of measurements. Signal was calculated by subtracting baseline from the values of absorbance change indicated by arrows in (a).
